1 Content type: Article

2 **THE SYSTEMATIC CONSERVATION PLANNING FOR INTRASPECIFIC**  
3 **GENETIC DIVERSITY.**

4 Ivan PAZ-VINAS<sup>1,2,3\*</sup>, Géraldine LOOT<sup>1,4</sup>, Virgilio HERMOSO<sup>6</sup>, Charlotte  
5 VEYSSIERE<sup>1,4</sup>, Nicolas POULET<sup>7</sup>, Gaël GRENOUILLET<sup>1,4</sup> and Simon  
6 BLANCHET<sup>1,5</sup>

7

8 <sup>1</sup> Centre National de la Recherche Scientifique (CNRS), Université Paul Sabatier (UPS),  
9 École Nationale de Formation Agronomique (ENFA); UMR 5174 EDB (Laboratoire  
10 Évolution & Diversité Biologique), 118 route de Narbonne, 31062 Toulouse cedex 4,  
11 France.

12 <sup>2</sup> Aix-Marseille Université, CNRS, IRD, Avignon Université; UMR 7263 IMBE, Équipe  
13 EGE, Centre Saint-Charles, Case 36, 3 place Victor Hugo, 13331 Marseille cedex 3,  
14 France.

15 <sup>3</sup> Université de Lyon, CNRS, ENTPE; UMR 5023 LEHNA, Laboratoire d'Écologie des  
16 Hydrosystèmes Naturels et Anthropisés, 6 rue Raphaël Dubois, 69622 Villeurbanne,  
17 France.

18 <sup>4</sup> Université de Toulouse, UPS; UMR 5174 EDB, 118 route de Narbonne, 31062  
19 Toulouse cedex 4, France.

20 <sup>5</sup> CNRS, Station d'Écologie Théorique et Expérimentale; UMR 5321, 09200 Moulis,  
21 France.

22 <sup>6</sup> Centre Tecnologic Forestal de Catalunya, Crta. Sant Llorenç de Monunys, Km 2,  
23 25280, Solsona. Lleida, Spain.

24 <sup>7</sup> Pôle Écohydraulique ONEMA-IMFT, Office National de l'Eau et des Milieux  
25 Aquatiques, France.

26

27 **Short title:** Conservation planning of genetic diversity

28

29 **Keywords:** biodiversity, dendritic ecological networks, fish, freshwater, genetic  
30 diversity, geostatistical tools, microsatellites, river basin, spatial patterns, systematic  
31 conservation planning

32

33 **\*Corresponding author:**

34

35 Ivan PAZ-VINAS

36 Université Lyon 1

37 CNRS, ENTPE, UMR 5023 LEHNA

38 Laboratoire d'Écologie des Hydrosystèmes Naturels et Anthropisés

39 3, rue Raphaël Dubois - Bât. Darwin C

40 69622 Villeurbanne Cedex France

41 Phone: (+33) 04 72 43 26 03

42 E-mail: ivanpaz23@gmail.com

43

44 **Co-author's e-mails:**

45

46 Simon Blanchet: [simon.blanchet@sete.cnrs.fr](mailto:simon.blanchet@sete.cnrs.fr)

47 Virgilio Hermoso: [virgilio.hermoso@gmail.com](mailto:virgilio.hermoso@gmail.com)

48 Charlotte Veyssière: [veyssiere.charlotte@gmail.com](mailto:veyssiere.charlotte@gmail.com)

49 Nicolas Poulet: [nicolas.poulet@onema.fr](mailto:nicolas.poulet@onema.fr)

50 Gaël Grenouillet: [gael.grenouillet@univ-tlse3.fr](mailto:gael.grenouillet@univ-tlse3.fr)

51 Géraldine Loot: [geraldine.loot@univ-tlse3.fr](mailto:geraldine.loot@univ-tlse3.fr)

52

53 **Abstract**

54

55         Intraspecific diversity is fundamental for species' adaptation to environmental  
56 changes, and should hence be a main target for biodiversity conservation. However,  
57 attempts to identify priority conservation areas for intraspecific diversity remain scarce.  
58 Here, we used molecular data on six freshwater fish species sampled at a large spatial  
59 scale, to determine hot- and cold-spots of genetic diversity, and to identify priority  
60 conservation areas using a systematic conservation planning approach. We demonstrate  
61 that the systematic conservation planning is an efficient and relevant approach for  
62 preserving intraspecific diversity, although we identify weak congruencies and  
63 surrogacies among conservation solutions found for each species. These weak  
64 congruencies are due to among-species variation in the spatial distribution of hot-spots  
65 of genetic diversity. We finally provide operational guidelines to efficiently use  
66 systematic conservation planning methods with intraspecific genetic diversity data, and  
67 to identify priority conservation areas for intraspecific diversity.

68

69

70         Biodiversity conservation is a major challenge that is often addressed by  
71 identifying protected areas with high biodiversity and/or landscape values<sup>1</sup>.  
72 Conservation areas are generally identified as areas with high proportions of endemic,  
73 rare or iconic species<sup>2</sup>. Alternatively, conservation planning can be based on the concept  
74 of complementarity between conservation areas<sup>3</sup>, and on cost-effectiveness analyses  
75 such as systematic conservation planning methods (hereafter SCP<sup>4</sup>). SCP aims at  
76 identifying a number of sites (i.e. *irreplaceable sites* that should be managed for  
77 conservation in priority) best representing a predefined proportion of the biodiversity  
78 observed in a region, at a minimum cost.

79         There have been attempts to include information on the phylogenetic history of  
80 species assemblages into SCP approaches to preserve both species identities and their  
81 macro-evolutionary history<sup>5,6</sup>. However, genetic diversity observed at the *population*

82 *level* (i.e. within species) has rarely been considered in SCP. *Intraspecific genetic*  
83 *diversity* is a fundamental facet of biodiversity, as it is the fuel for species to adapt to  
84 global and environmental changes<sup>7–10</sup>. Conservation geneticists have classically  
85 considered this facet of biodiversity in conservation plans, for instance by identifying  
86 “Evolutionary Significant Units” or unique genetic lineages<sup>11</sup>. However, conservation  
87 geneticists have almost ignored the possibility to combine genetic data (e.g. allele  
88 identities) with dedicated planning tools such as SPC<sup>12</sup>.

89 The relative lack of genetic datasets at *large* spatial scales may partly explain  
90 why SCP has yet rarely been applied to intraspecific genetic diversity<sup>13,14</sup>. Particularly,  
91 conservation geneticists have been generally restricted by the amount and spatial range  
92 of datasets. However, our capacity to compile genetic datasets at large spatial, temporal  
93 and taxonomic scales has greatly increased in the last decades<sup>15,16</sup>, so that it is now  
94 possible to identify priority areas for the conservation of genetic diversity using  
95 dedicated conservation planning tools.

96 Here, we tested the potential of SCP analyses to identify priority conservation  
97 areas accounting for intraspecific genetic diversity measured at a large spatial scale. We  
98 first considered a set of four common and representative freshwater fish species  
99 (*Squalius cephalus*, *Gobio occitaniae*, *Barbatula barbatula* and *Phoxinus phoxinus*) to  
100 test the influence of conservation targets (proportion of the total amount of genetic  
101 diversity to be covered by irreplaceable sites) and analytical strategies (analysing each  
102 species independently or all species pooled) on final conservation solutions (number  
103 and identity of irreplaceable sites). We then included two rare species of particular  
104 conservation interest (*Leuciscus burdigalensis* and *Parachondrostoma toxostoma*) to  
105 test the relevance of the SCP approach in a “real conservation-oriented study”. For these  
106 two species (and the four common species), we ran SCP analyses considering a typical

107 conservation target<sup>17,18</sup> to (i) explore the spatial distribution of irreplaceable sites in a  
108 riverscape, and (ii) test for congruency and surrogacy in irreplaceable sites among  
109 species, and more particularly between rare and common species. We finally tested  
110 whether –or not– irreplaceable sites were correctly predicted by classical indices of  
111 genetic diversity (e.g. allelic richness). We demonstrate that preserving the genetic  
112 diversity of a species assemblage is a feasible –yet complex– task necessitating  
113 appropriate analyses to assist the decision-making process.

114

## 115 **Results**

116

117 *Descriptive statistics.* We assessed for the six species within-sites intraspecific genetic  
118 diversity (i.e.  $\alpha$ -IGD) by calculating both allelic richness ( $AR$ ) and richness in private  
119 alleles ( $PA$ ). Overall, *P. toxostoma* (one of the two rare species) showed the lowest  $\alpha$ -  
120 IGD. Mean  $AR$  ranged from 2.114 for *P. toxostoma* to 5.821 for *P. phoxinus*, and mean  
121  $PA$  ranged from 0.036 for *P. toxostoma* to 0.162 for *L. burdigalensis* (Table S1). We  
122 also assessed among-sites intraspecific genetic diversity (i.e.  $\beta$ -IGD) by quantifying (for  
123 each species) how much a site is genetically unique compared to all others (using the  
124  $D_{est}$  index<sup>19</sup>, see the Methods section). *Parachondrostoma toxostoma* also showed the  
125 lowest mean  $D_{est}$  value (0.069), while the highest mean value was found for *B.*  
126 *barbatula* (0.383; Table S1).

127

128 Testing the suitability of SCP analyses for intraspecific genetic diversity

129

130           In this first step we focused on the four common species for which genetic data  
131 were available at a large spatial scale, allowing a thorough exploration of the suitability  
132 of SCP for intraspecific genetic diversity.

133

134 *Spatial patterns of genetic diversity.* Using Generalized Linear Models for Stream  
135 Networks (GLMSSN)<sup>20,21</sup>, we showed that spatial patterns of genetic diversity largely  
136 varied and were actually poorly congruent among the four common fish species (Figure  
137 1). As extreme examples, hotspots of *AR* for *S. cephalus* were mainly found in the  
138 Western part of the network and on the core streams, whereas these same areas were  
139 identified as coldspots of *AR* for *B. barbatula* (Figure 1A1-1A3). Similarly, hotspots of  
140 *PA* were inversely related between *G. occitaniae* and *P. phoxinus* (Figure 1B2-1B4).  
141 Similar conclusions were reached for *D<sub>est</sub>* (Figure 1C). For instance, hotspots of *D<sub>est</sub>*  
142 were observed in opposite areas of the river basin for the species pair *B. barbatula/P.*  
143 *phoxinus* (Figure 1C3-1C4). As a consequence, the sign, slope and significance of  
144 GLMSSNs explanatory variables strongly varied among species (Figure 1). This  
145 incongruence in spatial patterns of genetic diversity among species was also reflected by  
146 the low to moderate correlation coefficients measured among all possible pairs of  
147 species and for each index of genetic diversity (i.e. *AR*, *PA* and *D<sub>est</sub>*, Table S2). Indeed,  
148 Pearson's correlation coefficients were lower than 0.6 for all comparisons but two (i.e.  
149 between *B. barbatula/G. occitaniae* and between *P. phoxinus/B. barbatula* for *AR*, see  
150 Table S2).

151

152 *The influence of conservation targets and analytical strategies to identify irreplaceable*  
153 *sites for genetic conservation.* We used alleles' presence/absence data combined with  
154 SCP procedures to test the influence of conservation targets and analytical strategies on

155 the number and identity of irreplaceable sites (i.e. sites that were selected in all the  
156 solutions in SCP analyses; see the Methods section for more details).

157 When species were analysed independently, we found that the number of  
158 irreplaceable sites increased as the conservation target (i.e. the percentage of alleles to  
159 be covered by irreplaceable sites) increased, with a steep increase for conservation  
160 targets higher than 75% of the total number of alleles present at the river basin scale  
161 (Figure 2). However, the percentage of irreplaceable sites strongly varied among  
162 species. For instance, for a 90% conservation target –which is a common target in  
163 conservation genetics<sup>17</sup>–, the proportion of irreplaceable sites ranged from 3.61% of the  
164 total number of sampled sites for *G. occitaniae* to 28.57% for *P. phoxinus* (Table S3;  
165 Figure 2). For extreme conservation targets (100% of alleles to be covered), the  
166 proportion of irreplaceable sites varied from 25.30% for *G. occitaniae* to 68.26% for *P.*  
167 *phoxinus* (Table S3; Figure 2).

168 When alleles from the four common species were analysed in a single pooled  
169 analysis, we similarly found that the proportion of irreplaceable sites increase as the  
170 conservation target increases (Figure 2). Interestingly, we did not identify irreplaceable  
171 sites for the 30% conservation goal, and only 3 irreplaceable sites were found for the  
172 50% conservation goal (Figure 2). The proportion of irreplaceable sites increased  
173 moderately to 17.39% for the 75% target, and then steeply increased for higher  
174 conservation targets to reach 55.70% for the 90% target and 76.08% for the 100% target  
175 (Figure 2). This later result suggests that almost all the river basin should be protected  
176 to reach high conservation targets when adopting a pooled strategy.

177

178 A real conservation-oriented study using SCP approaches

179

180           We here focused on two rare species (in addition to the four common species) to  
181 explore the usefulness of SCPs in a real case study.

182

183 *Identification of irreplaceable sites for genetic conservation.* We first visually explored  
184 the spatial distribution of irreplaceable sites. Overall, the localization of irreplaceable  
185 sites in the riverscape strongly varied among species, being spread all over the river  
186 basin (Figure 3). We failed to identify areas (e.g. upstream or downstream locations)  
187 clustering irreplaceable sites for any species (Figure 3A-F). This apparent lack of  
188 clustering was statistically confirmed by our generalized linear models (Table S4).  
189 Indeed, the two positional indices we used as explanatory variables (i.e. distance from  
190 the outlet of sampling sites and the betweenness centrality of each sampling site, see the  
191 Methods section) were not significant predictors of the irreplaceability of sites for all  
192 species, except for distance from the outlet for *P. phoxinus* (Table S4). This indicates  
193 that neither the position of sites in the riverscape, nor the positional importance of these  
194 sites, determine the irreplaceability of sites.

195           Second, we tested whether conservation solutions found for each species were  
196 spatially congruent among species. Over the six fish species, we identified forty-two  
197 sites (out of the ninety-two sites, i.e. 45.65%) as irreplaceable at the 90% conservation  
198 target for at least one species (Figure 4). Thirty-two of these forty-two sites were  
199 irreplaceable for at least one of the four common species (Figure 4), and fourteen of the  
200 forty-two sites were irreplaceable for at least one of the two rare species (Figure 4).  
201 Among the six species, only eight out of these forty-two sites were irreplaceable for at  
202 least two species, and only one of these sites was irreplaceable for three species (Figure  
203 4).

204



205 *Surrogacy in irreplaceable sites among species.* We tested whether solutions found for  
206 one species can be used as a surrogate for other species by calculating the percentage of  
207 the total number of alleles observed for a given species that is covered by irreplaceable  
208 sites identified for another species. Levels of surrogacy were generally low to moderate,  
209 and strongly varied among species pairs (Table 1). For instance, irreplaceable sites  
210 identified for *G. occitaniae* failed to cover the genetic diversity of the two rare species,  
211 and covered only 17.66 to 42.60% of the total number of alleles of the other common  
212 species. This indicates that irreplaceable sites identified for *G. occitaniae* (i.e. the most  
213 widespread species) are poor surrogates for preserving the intraspecific genetic diversity  
214 of other species (18.38% of surrogacy; Table 1). Conversely, irreplaceable sites found  
215 for *P. phoxinus* and *L. burdigalensis* are better surrogates for *G. occitaniae*, as 79.58%  
216 and 70.27% of the total number of alleles of *G. occitaniae* was covered by irreplaceable  
217 sites identified for *P. phoxinus* and *L. burdigalensis* respectively (Table 1). Overall,  
218 irreplaceable sites best covering genetic diversity of other species were those identified  
219 for *B. barbatula*, which covered in average 68.28% of the total number of alleles of  
220 other species (Table 1).

221 Interestingly, the thirty-two irreplaceable sites identified for the four common  
222 species covered 79.87% and 90% of the total number of alleles of *L. burdigalensis* and  
223 *P. toxostoma* respectively, suggesting that irreplaceable sites identified for a set of  
224 common species can be good surrogates for intraspecific genetic diversity of rare  
225 species. Conversely, the fourteen irreplaceable sites identified for the two rare species  
226 covered a total number of alleles ranging from 65.18% for *S. cephalus* to 79.40% for *B.*  
227 *barbatula*.

228

229 *Relationships between genetic indices and irreplaceable sites.* For all species but *G.*  
230 *occitaniae* and *P. toxostoma* (for which none of the variables were significant  
231 predictors), *PA* was identified as the only variable that significantly predicted the  
232 probability for a site to be identified as an irreplaceable site (Table S5). This probability  
233 increased with the number of *PA* in a site.

234

## 235 **Discussion**

236

237 Intraspecific diversity constitutes the fuel for species and populations to cope  
238 with environmental changes<sup>7–9</sup>. This biodiversity facet is hence the first that should  
239 respond to global change, allowing populations and species to respond adaptively to  
240 these changes<sup>10</sup>. However, this biodiversity facet has so far been poorly integrated in  
241 dedicated optimization planning tools. We here fill this gap by demonstrating that the  
242 systematic conservation planning of intraspecific genetic diversity is a feasible –yet  
243 complex– task necessitating careful considerations.

244

245 *From idiosyncratic distributions of genetic diversity...*

246 Our results strongly suggest that the genetic diversity of the targeted species did  
247 not follow a common spatial pattern, but rather species-specific (idiosyncratic) spatial  
248 distributions. This conclusion holds true for all genetic diversity indices, and it  
249 corroborates the few previous studies investigating simultaneously the spatial  
250 distribution of genetic diversity at large spatial scales and for sympatric species  
251 (e.g.<sup>22,23</sup>). This was however unexpected given that recent meta-analyses on freshwater  
252 organisms demonstrated that  $\alpha$ -IGD is generally higher in downstream than in upstream  
253 areas<sup>24</sup>, and that  $\beta$ -IGD tends to be higher in upstream than in downstream sections<sup>25</sup>.

254 Overall, these very general spatial patterns of intraspecific genetic diversity were  
255 verified in our datasets. For instance, a negative relationship between allelic richness  
256 and distance from the outlet is expected in freshwater organisms<sup>24</sup>, and was actually  
257 observed for three out of the six species considered in this study (Figure S1). However,  
258 when using a precise and novel approach to map genetic diversity across the network,  
259 we demonstrated that the distribution of cold- and hot-spots of  $\alpha$ - and  $\beta$ -IGD was subtler  
260 and idiosyncratic. This probably reflects interactions between colonization histories,  
261 life-history-traits of species and the network structure, which are expected to drive  
262 patterns of genetic diversity in rivers<sup>24,26,27</sup>.

263

264 *...to the systematic conservation planning of intraspecific genetic diversity.*

265 The spatial mismatch in intraspecific genetic diversity among species probably  
266 explains why we found that the level of congruency and surrogacy of irreplaceable sites  
267 identified for each species was extremely low. For instance, there was an extremely low  
268 proportion of irreplaceable sites that were common to two or three species (and never  
269 more than three species; Figure 4). In the same way, we detected no clear patterns in the  
270 spatial distribution of irreplaceable sites. In riverscapes, it is generally assumed that  
271 small upstream areas are the “source” of genetic uniqueness, and hence the primary  
272 areas to protect (i.e. the “small but mighty” paradigm<sup>25</sup>). Our results did not confirm this  
273 paradigm since irreplaceable sites (for any of the six species) were not particularly  
274 situated in upstream areas and/or in areas of high connectivity (i.e. areas displaying high  
275 centrality values<sup>28,29</sup>), and rather suggests that priority areas for the conservation of  
276 intraspecific genetic diversity should cover the whole distribution range of species.  
277 Finally, the level of surrogacy among irreplaceable sites was low to moderate, and never  
278 attained the 90% threshold we assumed when we considered all species

279 independently<sup>17,18</sup>. Combined with our finding that the number of irreplaceable sites can  
280 be relatively high for reasonable conservation targets (up to 46% sites are identified as  
281 irreplaceable sites for at least one species at the conservation target of 90%), we  
282 concluded that our ability to identify priority areas for intraspecific genetic diversity is  
283 highly species-specific and depends on the capacity to tackle the trade-off between the  
284 amount of genetic diversity to protect, and the extent of priority areas we can  
285 realistically protect.

286         However, when surrogacy between all irreplaceable sites identified for the entire  
287 set of common species and those identified for the rare species was tested, we reached  
288 reasonable proportions of the total number of alleles to protect (~80-90%) for the two  
289 rare species (i.e. *P. toxostoma* and *L. burdigalensis*). This result suggests that, in some  
290 cases, genetic data obtained for a set of widely-distributed, “easier-to-sample” common  
291 species displaying varying life-history traits can be used for identifying protection areas  
292 for the intraspecific genetic diversity of other sympatric rare species that can be more  
293 problematic to sample.

294         Overall, our results suggest that two different analytical strategies can be  
295 employed in real-case SCP studies aiming at preserving intraspecific genetic diversity  
296 (i) identification of conservation areas for each rare species independently or (ii)  
297 identification of conservation areas for a set of representative common species. Both  
298 strategies have their own advantages and inconveniences. The first strategy optimally  
299 preserves genetic diversity of rare species at competitive costs (e.g. 14 irreplaceable  
300 sites to protect in our demonstrative study), but this at the expense of the genetic  
301 diversity of other sympatric species. Conversely, the second strategy will optimally  
302 preserve genetic diversity of a set of common species while maintaining high levels of  
303 genetic diversity for rare species, but this at a higher cost (e.g. 32 irreplaceable sites to

304 protect in our study). Whether to choose one of these two strategies will therefore  
305 depend on many factors such as how difficult is the sampling of rare species compared  
306 to common species, or the extent of the resources available for setting new protected  
307 areas. We recommend however to adopt the second strategy when possible, since it  
308 allows to simultaneously maintain genetic diversity from rare and common species.  
309 Indeed, genetic diversity of common species is vital for ensuring ecosystem stability, as  
310 it ultimately influence species interactions, population dynamics and ecosystem  
311 functions<sup>30</sup>, and we argue that it should be considered in conservation plans.

312

### 313 **Conclusions**

314

315 Our study provides novel, insightful and promising knowledge on the setting of  
316 priority conservation areas for intraspecific diversity. It shows that systematic  
317 conservation planning methods are useful objective tools for conservation geneticists  
318 whose conservation solutions will strikingly depend on the species to be preserved and  
319 the quantity of genetic information that managers aim at preserving in a landscape.  
320 Given our results, we suggest that two strategies could be employed in real-case  
321 conservation programs: (i) identification of priority conservation areas for each rare  
322 species independently or (ii) identification of priority conservation areas on the basis of  
323 the analysis of a set of representative common species that may serve as “umbrellas” for  
324 rare sympatric species.

325 Our study also raises many additional questions that should be considered in the  
326 near future. Among others, we believe that the next steps will be to formally identify  
327 sound conservation targets for intraspecific diversity, to test whether neutral  
328 intraspecific diversity appropriately mirrors quantitative and adaptive diversity<sup>9</sup>, and to

329 quantify the influence of intraspecific diversity on ecosystem functioning and services,  
330 so as to better evaluate the added value of preserving such a facet of biodiversity<sup>9,31</sup>.

331

## 332 **Methods**

333

### 334 Data collection

335

336 *Biological models.* We focused on an assemblage of six Cyprinid freshwater fish  
337 species. Three of them are widespread in Europe (i.e. *Squalius cephalus*, *Phoxinus*  
338 *phoxinus* and *Barbatula barbatula*) whereas three of them (*Gobio occitaniae*, *Leuciscus*  
339 *burdigalensis* and *Parachondrostoma toxostoma*) are endemic to Southern France<sup>32</sup>.

340 This set of species covers a large functional trait space that is representative of many  
341 freshwater fish communities. For instance, *S. cephalus* is a large-bodied fish species  
342 with long lifespan (i.e. it can be 60 cm long and live up to 15 years<sup>32</sup>) whereas at the  
343 extreme *P. phoxinus* is a small-bodied species with shorter lifespan (i.e. it is less than 12  
344 cm long and usually lives up to 4-5 years<sup>32</sup>). From an ecological perspective, *G.*  
345 *occitaniae*, *P. toxostoma* and *B. barbatula* are bottom feeders, whereas *S. cephalus* and  
346 *P. phoxinus* are water column feeders and *L. burdigalensis* is more opportunistic.  
347 Further, *B. barbatula* is mainly active during night, while the other species are  
348 particularly active during the day. Four of these species are relatively abundant (i.e. *S.*  
349 *cephalus*, *G. occitaniae*, *P. phoxinus* and *B. barbatula*), although they greatly vary in  
350 their ecological niche and hence their spatial occupancy in the river network (see Figure  
351 S2 for maps representing the spatial distribution of sampling sites for each species,  
352 which roughly corresponds to their spatial distribution in the Garonne-Dordogne river  
353 basin). We will hereafter refer to this set of species as the “common” species. The two

354 other species are rare (*L. burdigalensis*) to very rare (*P. toxostoma*; see Figure S2) in the  
355 Garonne-Dordogne river basin, and are of particular interest for conservation. *Leuciscus*  
356 *burdigalensis* is a recently described species that is locally experiencing both  
357 demographic and genetic bottlenecks in many populations<sup>33,34</sup>. *Parachondrostoma*  
358 *toxostoma* is a vulnerable species<sup>35</sup> listed in the IUCN red list, in the Annex II of the  
359 European Union Habitats Directive and in Appendix III of the Bern Convention<sup>35</sup>.

360

361 *Sampling design.* During Spring/Summer 2010-2011, we used electric-fishing to sample  
362 ninety-two sites distributed across thirty-five rivers from a large river basin, the  
363 Garonne-Dordogne River basin (>100,000 km<sup>2</sup>, South-Western France; Figure S2;  
364 Table S6). Sampling sites were chosen to cover the whole distribution range of each  
365 species at the riverscape scale, and to allow characterising spatial patterns of genetic  
366 diversity for all these species. Up to 25 individuals *per species per site* were sampled  
367 when possible. Not all species were present at all sampling sites (Figure S2; Table S6),  
368 and some species were at a density that did not allow reaching the 25 individuals  
369 threshold. In these cases, we captured as many individuals as possible. We anesthetized  
370 each individual and then we collected and stored in 90% ethanol a fragment of their  
371 pelvic fin. All individuals were released alive at their sampling location.

372

373 *Genotyping.* Genomic DNA was extracted using a salt-extraction protocol<sup>36</sup>. We used  
374 multiplexed Polymerase Chain Reactions (PCRs) to co-amplify 8 to 15 microsatellite  
375 loci depending on the species (8 for *G. occitaniae*, 9 for *B. barbatula*, 10 for *S. cephalus*  
376 and *P. phoxinus*, 14 for *L. burdigalensis* and 15 for *P. toxostoma*). We used 5-20 ng of  
377 genomic DNA and QIAGEN® Multiplex PCR Kits (Qiagen, Valencia, CA, USA) to  
378 perform PCR amplifications. Details on loci, primer concentrations, PCR conditions and

379 multiplex sets can be found in Table S7. The genotyping was conducted on an ABI  
380 PRISM™ 3730 Automated Capillary Sequencer (Applied Biosystems, Foster City, CA,  
381 USA). The scoring of allele sizes was done using GENEMAPPER® v.4.0 (Applied  
382 Biosystems).

383

384 *Genetic diversity assessment.* Given the good spatial resolution of the sampling obtained  
385 for the four common species (i.e. *S. cephalus*, *G. occitaniae*, *P. phoxinus* and *B.*  
386 *barbatula*), descriptive genetic analyses were conducted for sampling sites displaying a  
387 minimum sample size of N=10 individuals for these species, so as to maximize  
388 consistency on subsequent allelic frequency-based genetic analyses (see Figure S2 and  
389 Table S6 for details on sample sizes). For the two rare species, for which the sampling  
390 was more restricted (i.e. *L. burdigalensis* and *P. toxostoma*), genetic analyses were  
391 conducted for sampling sites displaying a minimum sample size of N=6 individuals, so  
392 as to maximize the number of sampling sites included in the SCP procedures. We then  
393 determined for each of the six species the occurrence of null alleles and potential  
394 scoring errors with the program MICROCHECKER 2.3<sup>37</sup>. We tested for departures  
395 from Hardy-Weinberg (HW) equilibrium with the ‘adegenet’ R package v1.6-2<sup>38</sup>. The  
396 program GENEPOP v4.0<sup>39</sup> was used to assess linkage disequilibrium among loci within  
397 sites. We found significant deviations from HW for a few locus/population pairs for  
398 each six species (see Appendix A1 and Supplementary File 1 for details and raw tables),  
399 and significant linkage disequilibrium and homozygote excesses for only the four  
400 common species (Appendix A1; Supplementary File 1). However, no clear patterns  
401 were observed for any species across loci and populations for these deviations. Given  
402 the small extent of these deviations and given the large spatial extent of the databases,



403 we assumed that they weakly affected our main findings (Appendix A1; Supplementary  
404 File 1).

405 To assess within-sites intraspecific genetic diversity (i.e.  $\alpha$ -IGD), we applied  
406 rarefaction procedures implemented in ADZE v1.0<sup>40</sup> to calculate both allelic richness  
407 ( $AR^{41}$ ) and private allelic richness ( $PA^{42}$ ) at the sampling site level (based on a  
408 minimum of N=10 individuals for common species or N=6 individuals for rare species).  
409 To assess the among-sites component of intraspecific genetic diversity (i.e.  $\beta$ -IGD), we  
410 used the R package ‘mmod’<sup>43</sup> to calculate –for each species– a pairwise genetic  
411 differentiation index (i.e.  $D_{est}^{19}$ ). For each site (and species), we then derived the  
412 averaged value of all pairwise  $D_{est}$  values estimated between one given site and all the  
413 remaining sites, so as to obtain a single value *per* site.

414

#### 415 Testing the suitability of SCP analyses for intraspecific genetic diversity

416

417 In the first step, we tested the influence of conservation targets and analytical  
418 strategies on final conservation solutions. In this step, we focused specifically on data  
419 from the four common species, as their large coverage of the sampling area is more  
420 suited for the demonstrative exercise done in this step.

421

422 *Spatial patterns of genetic diversity.* We first used geostatistical modelling tools to  
423 explore spatial patterns of  $\alpha$  and  $\beta$  genetic diversity for the four common species at the  
424 riverscape scale by predicting the distributions of  $AR$ ,  $PA$  and  $D_{est}$  from the observed  
425 empirical values using Generalized Linear Models for Spatial Stream Networks  
426 (GLMSSN<sup>20,21</sup>). This was done using the ‘STARS’ toolset of ARCGIS v10.2 and the R  
427 package ‘SSN’<sup>20,21</sup>. We conducted a model selection procedure based on a comparison

428 of Akaike Information Criteria (AIC) estimated for several competing GLMSSNs.  
429 These models were built by (i) assuming three geographic descriptors (i.e. topological  
430 distance from the outlet, longitude and latitude) as explanatory variables, and (ii)  
431 choosing a tail-down covariance structure model among the following ones:  
432 exponential, Matérn, spherical, linear-with-sill and Epanechnikov. As the number of  
433 explanatory variables differed among the GLMSSNs we built, we used the maximum  
434 likelihood estimation method for each GLMSSN, so as to allow AIC-based model  
435 comparisons. For each common species and genetic index, the best model had the  
436 lowest AIC score (see Supplementary File 1 for raw results). This model was used to  
437 estimate the slope and the significance of the relationships between explanatory  
438 variables and each genetic index, so as to test whether or not spatial patterns of  
439 intraspecific genetic diversity can be detected. We finally used predictions from the best  
440 models to produce krigged maps for each common species and each genetic index, so as  
441 to visually represent the spatial distribution of intraspecific genetic diversity across the  
442 whole river drainage, and to visually highlight hot- and cold-spots of intraspecific  
443 genetic diversity. We also calculated Pearson's correlation coefficients between values  
444 calculated at the site level for each genetic index (i.e.  $AR$ ,  $PA$  and  $D_{est}$ ) for each pair of  
445 common species, so as to test for spatial congruency in patterns of genetic diversity  
446 among common species.

447

448 *Identification of irreplaceable sites.* We then tested whether conservation targets (i.e.  
449 the percentage of total number of conservation units to be present in the final  
450 conservation solution) and analytical approaches (i.e. species-specific or species-pooled  
451 analyses) influence the identification of irreplaceable sites. SCP methods traditionally  
452 use species presence/absence data as input data to identify irreplaceable sites for the

453 conservation of taxonomic diversity at the community level (i.e. sites that cannot be  
454 excluded from an optimal selection of sites for conservation)<sup>44</sup>. Here, we replaced  
455 species presence/absence data by alleles' presence-absence data to identify irreplaceable  
456 sites for the conservation of intraspecific genetic diversity of each species in the river  
457 drainage. We used the program Marxan v2.1<sup>44</sup> and genetic data from the common  
458 species to identify, for each common species independently, an optimal set of sites that  
459 best represent at least 50, 75, 90 or 100% of the total number of alleles present in the  
460 whole riverscape at a minimum "cost", which corresponds to four conservation targets.  
461 Given the lack of ground estimates for conservation cost, we used a constant cost *per*  
462 site, so our objective translated into identifying the minimum number of sites that  
463 represent a given proportion of intraspecific genetic diversity (i.e. 50, 75, 90 or 100% of  
464 the total pool of alleles represented at least once<sup>45</sup>). We arbitrarily choose the 50, 75 and  
465 100% conservation targets to explore how the proportion of alleles to protect affects the  
466 selection of irreplaceable sites. We additionally tested the 90% conservation target, as it  
467 corresponds to a threshold target being typically assumed in *ex-situ* conservation  
468 plans<sup>17,18</sup>. In order to estimate the relevance of each site to preserve a given proportion  
469 of the allelic diversity in the river basin, we used two different methods. In case of  
470 100% of allelic diversity, we used the traditional irreplaceability measure reported by  
471 Marxan, which ranges between 100% (highly irreplaceable) and 0% (not irreplaceable).  
472 This measure is estimated by running the optimization algorithm a number of times  
473 (N=100 runs in our case) and then computing the frequency of selection of each site  
474 within the solutions obtained. Sites with unique allelic composition will be selected  
475 across all runs and reported as highly irreplaceable, whereas sites with more common  
476 alleles, replaceable by other sites with the same alleles, will appear poorly irreplaceable.  
477 For the other conservation targets, we selected a random pull of 50, 75 and 90% of the

478 total number of alleles existing at the basin level and for each species. We then ran the  
479 optimization algorithm to identify the minimum set of sites representing this particular  
480 selection of alleles. Given that the analyses were run only on a subset of alleles, we  
481 replicated this process 100 times to minimize the effect of the arbitrary selection of  
482 alleles. For each subset of alleles, we ran the Marxan procedure as explained above (e.g.  
483 constant cost and 100 runs for each) and retained the best solution for subsequent  
484 analyses (solution with the lowest value for the objective function). We then calculated  
485 the irreplaceability as the frequency of selection of each site within the 100 random pull  
486 of alleles. For a given species and a given conservation target, we considered a site as  
487 irreplaceable for genetic diversity conservation when it displayed an irreplaceability  
488 value of 100%. We selected such a high threshold so as to be conservative. We tested  
489 and compared visually how the proportions of irreplaceable sites vary among species  
490 and conservation targets.

491 To test how pooling data from several species affect the identification of  
492 irreplaceable sites, we further performed a “pooled” analysis, in which all alleles found  
493 for each common species at a site were pooled together in a single input dataset. We  
494 then selected a random pull of 30, 50, 75, 90 and 100% of the total number of alleles  
495 existing at the basin level (all common species confounded), and performed 100 Marxan  
496 runs *per* conservation targets to identify the minimum set of sites representing these  
497 particular selections of alleles.

498

#### 499 A real conservation-oriented study using SCP approaches

500

501 In this second step, we (i) explored the spatial distribution of irreplaceable sites,  
502 (ii) tested whether conservation solutions found for each species are congruent among

503 species, (iii) tested whether solutions found for one species can be used as a surrogate  
504 for other species, and (iv) tested whether –or not– irreplaceable sites are correctly  
505 predicted by classical indices of genetic diversity. In this step, we included the two rare  
506 species, since congruency and surrogacy are particularly important to measure for rare  
507 species for which data are more difficult to collect. We therefore focus more specifically  
508 on the comparisons implying common vs. rare species.

509

510 *Identification of irreplaceable sites for genetic conservation.* We focused only on  
511 irreplaceable sites identified for the 90% target and used the program Marxan as  
512 described above to identify these sites for *L. burdigalensis* and *P. toxostoma*  
513 independently, in addition of the four common species.

514 We mapped these irreplaceable sites (for the six species pooled or independently)  
515 on the river network, so as to test (i) whether or not specific areas harboured more  
516 irreplaceable sites (e.g. upstream areas that are generally thought to be of high  
517 conservation priority<sup>25</sup>) and (ii) if irreplaceable sites are spatially congruent among  
518 species and, most notably, among common and rare species. In addition, we ran GLMs  
519 (assuming a binomial error terms distribution) including whether or not a site has been  
520 designated as an irreplaceable site at the 90% target as a binomial dependent variable,  
521 and distance to the outlet of sampling sites and betweenness centrality values<sup>46,47</sup> for  
522 each sites explanatory variables. Betweenness centrality is an index quantifying the  
523 positional importance of each sampling site within the river basin<sup>28,29</sup>. The significance  
524 of each term was tested at the  $\alpha=0.05$  threshold.

525

526 *Surrogacy in irreplaceable sites among species.* We then estimated the levels of  
527 surrogacy among species by calculating the percentage of the total number of alleles

528 observed for a given species that is covered by irreplaceable sites identified for another  
529 species. Although surrogacy was calculated for all species pairs, we specifically focused  
530 on rare species by calculating (i) the percentage of the total number of alleles observed  
531 for rare species covered by all the irreplaceable sites identified for all the common  
532 species, and (ii) the percentage of the total number of alleles observed for common  
533 species covered by all the irreplaceable sites identified for the rare species.

534

535 *Relationships between irreplaceable sites and indices of genetic diversity.* To test the  
536 ability of classical genetic indices to predict the propensity for a site to be irreplaceable  
537 from a conservation viewpoint, we ran for each species Generalized Linear Models  
538 (GLMs, with a binomial error terms distribution) including whether or not a site has  
539 been designated as an irreplaceable site at the 90% target as a binomial dependent  
540 variable, and  $AR$ ,  $PA$  and  $D_{est}$  as explanatory variables. We tested the significance of  
541 each term at the  $\alpha=0.05$  threshold. Explanatory variables were centred and scaled, in  
542 order to compare the relative strength of the predictors among species.

543

#### 544 **Acknowledgements**

545

546 We are very grateful to all the ONEMA staff that contributed to the field  
547 sampling, in particular Laurence Blanc, Leslie Faggiano, Charlotte Evangelista,  
548 Christine Lauzeral, Loïc Tudesque, Roselyne Étienne, Sébastien Villéger, Julien  
549 Cucherousset, Vincent Dubut, Alain Blanchet and South-Western France ONEMA staff  
550 are thanked for their help in the field. Roselyne Étienne and Vincent Dubut are also  
551 thanked for their help with molecular analyses. Lisa Fourtune is acknowledged for  
552 having calculated the betweenness centrality values of our river network. We also thank

553 Marie-Hélène Lizée for her help with GIS tools and Camille Pagès for her comments.  
554 Further, the authors thank the “Génopole Toulouse” for help with genotyping and Keoni  
555 Saint-Pée for correcting the English. IPV was financially supported by a MESR  
556 (“Ministère de l'Enseignement Supérieur et de la Recherche”) PhD scholarship during  
557 this study. VH was funded by the National Environmental Research Program Northern  
558 Australia Hub and a “Ramon y Cajal” contract (RYC-2013-13979) funded by the  
559 Spanish government. This study is part of the European project “IMPACT”. This  
560 project has been carried out with financial support from the Commission of the  
561 European Communities, specific RTD programme “IWRMNET”. This work has been  
562 done in two research units (EDB & SETE) that are part of the “Laboratoire  
563 d'Excellence” (LABEX) entitled TULIP (ANR-10-LABX-41).

564

## 565 **References**

566

- 567 1. Watson, J. E. M., Dudley, N., Segan, D. B. & Hockings, M. The performance and  
568 potential of protected areas. *Nature* **515**, 67–73 (2014).
- 569 2. Filipe, A. F. *et al.* Selection of priority areas for fish conservation in Guadiana River  
570 Basin, Iberian Peninsula. *Conserv. Biol.* **18**, 189–200 (2004).
- 571 3. Kirkpatrick, J. B. An iterative method for establishing priorities for the selection of  
572 nature reserves: An example from Tasmania. *Biol. Conserv.* **25**, 127–134 (1983).
- 573 4. Margules, C. R. & Pressey, R. L. Systematic conservation planning. *Nature* **405**,  
574 243–253 (2000).
- 575 5. Asmyhr, M. G., Linke, S., Hose, G. & Nipperess, D. A. Systematic conservation  
576 planning for groundwater ecosystems using phylogenetic diversity. *PLoS ONE* **9**,  
577 e115132 (2014).

- 578 6. Buerki, S. *et al.* Incorporating evolutionary history into conservation planning in  
579 biodiversity hotspots. *Philos. Trans. R. Soc. B Biol. Sci.* **370**, 20140014–20140014  
580 (2015).
- 581 7. Hoffmann, A. A. & Sgrò, C. M. Climate change and evolutionary adaptation.  
582 *Nature* **470**, 479–485 (2011).
- 583 8. Carroll, S. P. *et al.* Applying evolutionary biology to address global challenges.  
584 *Science* **346**, 1245993–1245993 (2014).
- 585 9. Mittell, E. A., Nakagawa, S. & Hadfield, J. D. Are molecular markers useful  
586 predictors of adaptive potential? *Ecol. Lett.* **18**, 772–778 (2015).
- 587 10. Rey, O., Danchin, E., Mirouze, M., Loot, C. & Blanchet, S. Adaptation to Global  
588 Change: A Transposable Element–Epigenetics Perspective. *Trends Ecol. Evol.* **31**,  
589 514–526 (2016).
- 590 11. Pritchard, J. K., Stephens, M. & Donnelly, P. Inference of population structure  
591 using multilocus genotype data. *Genetics* **155**, 945–959 (2000).
- 592 12. Diniz-Filho, J. A. F. *et al.* Planning for optimal conservation of geographical  
593 genetic variability within species. *Conserv. Genet.* **13**, 1085–1093 (2012).
- 594 13. Grantham, H. S., Pressey, R. L., Wells, J. A. & Beattie, A. J. Effectiveness of  
595 Biodiversity Surrogates for Conservation Planning: Different Measures of  
596 Effectiveness Generate a Kaleidoscope of Variation. *PLoS ONE* **5**, e11430 (2010).
- 597 14. Hermoso, V., Januchowski-Hartley, S. R. & Pressey, R. L. When the suit does not  
598 fit biodiversity: Loose surrogates compromise the achievement of conservation  
599 goals. *Biol. Conserv.* **159**, 197–205 (2013).
- 600 15. Andrew, R. L. *et al.* A road map for molecular ecology. *Mol. Ecol.* **22**, 2605–2626  
601 (2013).



- 602 16. Pauls, S. U. *et al.* Integrating molecular tools into freshwater ecology: developments  
603 and opportunities. *Freshw. Biol.* **59**, 1559–1576 (2014).
- 604 17. Frankham, R., Briscoe, D. A. & Ballou, J. D. *Introduction to conservation genetics*.  
605 (Cambridge University Press, 2002).
- 606 18. Neel, M. C. & Cummings, M. P. Effectiveness of conservation targets in capturing  
607 genetic diversity. *Conserv. Biol.* **17**, 219–229 (2003).
- 608 19. Jost, L. G(ST) and its relatives do not measure differentiation. *Mol. Ecol.* **17**, 4015–  
609 4026 (2008).
- 610 20. Peterson, E. & Ver Hoef, J. M. V. STARS: STARS: An ArcGIS toolset used to  
611 calculate the spatial information needed to fit spatial statistical models to stream  
612 network data. *J. Stat. Softw.* **56**, 1–17 (2014).
- 613 21. Ver Hoef, J., Peterson, E., Clifford, D. & Shah, R. SSN: An R Package for Spatial  
614 Statistical Modeling on Stream Networks. *J. Stat. Softw.* **56**, 1–43 (2014).
- 615 22. Fortuna, M. A., Albaladejo, R. G., Fernandez, L., Aparicio, A. & Bascompte, J.  
616 Networks of spatial genetic variation across species. *Proc. Natl. Acad. Sci.* **106**,  
617 19044–19049 (2009).
- 618 23. Taberlet, P. *et al.* Genetic diversity in widespread species is not congruent with  
619 species richness in alpine plant communities. *Ecol. Lett.* **15**, 1439–1448 (2012).
- 620 24. Paz-Vinas, I., Loot, G., Stevens, V. M. & Blanchet, S. Evolutionary processes  
621 driving spatial patterns of intraspecific genetic diversity in river ecosystems. *Mol.*  
622 *Ecol.* **24**, 4586–4604 (2015).
- 623 25. Finn, D. S., Bonada, N., Múrria, C. & Hughes, J. M. Small but mighty: headwaters  
624 are vital to stream network biodiversity at two levels of organization. *J. North Am.*  
625 *Benthol. Soc.* **30**, 963–980 (2011).

- 626 26. Paz-Vinas, I. & Blanchet, S. Dendritic connectivity shapes spatial patterns of  
627 genetic diversity: a simulation-based study. *J. Evol. Biol.* **28**, 986–994 (2015).
- 628 27. Thomaz, A. T., Christie, M. R. & Knowles, L. L. The architecture of river networks  
629 can drive the evolutionary dynamics of aquatic populations. *Evolution* **70**, 731–739  
630 (2016).
- 631 28. Altermatt, F. Diversity in riverine metacommunities: a network perspective. *Aquat.*  
632 *Ecol.* **47**, 365–377 (2013).
- 633 29. Fourtune, L., Paz-Vinas, I., Loot, G., Prunier, J. G. & Blanchet, S. Lessons from the  
634 fish: a multi-species analysis reveals common processes underlying similar species-  
635 genetic diversity correlations. *Freshw. Biol.* (2016). doi:10.1111/fwb.12826
- 636 30. Mimura, M. *et al.* Understanding and monitoring the consequences of human  
637 impacts on intraspecific variation. *Evol. Appl.* **10**, 121–139 (2017).
- 638 31. Siefert, A. *et al.* A global meta-analysis of the relative extent of intraspecific trait  
639 variation in plant communities. *Ecol. Lett.* **18**, 1406–1419 (2015).
- 640 32. Kottelat, M. & Freyhof, J. *Handbook of European freshwater fishes*. (Publications  
641 Kottelat, 2007).
- 642 33. Poulet, N., Beaulaton, L. & Dembski, S. Time trends in fish populations in  
643 metropolitan France: insights from national monitoring data. *J. Fish Biol.* **79**, 1436–  
644 1452 (2011).
- 645 34. Paz-Vinas, I., Quéméré, E., Chikhi, L., Loot, G. & Blanchet, S. The demographic  
646 history of populations experiencing asymmetric gene flow: combining simulated  
647 and empirical data. *Mol. Ecol.* **22**, 3279–3291 (2013).
- 648 35. Paz-Vinas, I. *et al.* Combining genetic and demographic data for prioritizing  
649 conservation actions: insights from a threatened fish species. *Ecol. Evol.* **3**, 2696–  
650 2710 (2013).

- 651 36. Aljanabi, S. M. & Martinez, I. Universal and rapid salt-extraction of high quality  
652 genomic DNA for PCR-based techniques. *Nucleic Acids Res.* **25**, 4692–4693  
653 (1997).
- 654 37. Van Oosterhout, C., Hutchinson, W. F., Wills, D. P. M. & Shipley, P. micro-  
655 checker: software for identifying and correcting genotyping errors in microsatellite  
656 data. *Mol. Ecol. Notes* **4**, 535–538 (2004).
- 657 38. Jombart, T. adegenet: a R package for the multivariate analysis of genetic markers.  
658 *Bioinformatics* **24**, 1403–1405 (2008).
- 659 39. Rousset, F. genepop'007: a complete re-implementation of the genepop software for  
660 Windows and Linux. *Mol. Ecol. Resour.* **8**, 103–106 (2008).
- 661 40. Szpiech, Z. A., Jakobsson, M. & Rosenberg, N. A. ADZE: a rarefaction approach  
662 for counting alleles private to combinations of populations. *Bioinformatics* **24**,  
663 2498–2504 (2008).
- 664 41. Petit, R. J., El Mousadik, A. & Pons, O. Identifying Populations for Conservation  
665 on the Basis of Genetic Markers. *Conserv. Biol.* **12**, 844–855 (1998).
- 666 42. Kalinowski, S. T. Counting alleles with rarefaction: Private alleles and hierarchical  
667 sampling designs. *Conserv. Genet.* **5**, 539–543 (2004).
- 668 43. Winter, D. J. mmod: an R library for the calculation of population differentiation  
669 statistics. *Mol. Ecol. Resour.* **12**, 1158–1160 (2012).
- 670 44. Ball, I. R., Possingham, H. P. & Watts, M. in *Spatial conservation prioritisation:*  
671 *Quantitative methods and computational tools* (eds. Moilanen, A., Wilson, K. A. &  
672 Possingham, H. P.) **Chapter 14**, 185–195 (Oxford Iniversity Press, Oxford, UK,  
673 2009).

674 45. Hermoso, V. & Kennard, M. J. Uncertainty in coarse conservation assessments  
675 hinders the efficient achievement of conservation goals. *Biol. Conserv.* **147**, 52–59  
676 (2012).

677 46. Freeman, L. C. A set of measures of centrality based on betweenness. *Sociometry*  
678 **40**, 35 (1977).

679 47. Estrada, E. & Bodin, Ö. Using network centrality measures to manage landscape  
680 connectivity. *Ecol. Appl.* **18**, 1810–1825 (2008).

681

682 **Author Contributions:** The study was designed by SB, GL and IPV. IPV and SB  
683 wrote the manuscript with the help of VH, GG, NP and GL. IPV, SB, GL and CV  
684 collected the samples. GL and CV produced the genetic data. IPV, VH and SB  
685 conducted the population genetic and statistical analyses.

686

687 **Competing Financial Interests statement:** Authors declare not having any competing  
688 financial interest.

689

690 **Figures legends**

691

692 **Figure 1**

693 Spatial distribution of observed (coloured circles) and interpolated (coloured lines)  
694 values of  $AR$ ,  $PA$  and  $D_{est}$  (A, B, C respectively in the figure) for *Squalius cephalus*,  
695 *Gobio occitaniae*, *Barbatula barbatula*, and *Phoxinus phoxinus* (1, 2, 3, 4 respectively  
696 in the figure) obtained with GLMSSNs. The width of coloured lines is inversely related  
697 to the prediction standard error. The cursor on the vertical coloured scale indicates the  
698 mean value of  $AR$ ,  $PA$  and  $D_{est}$ . The slope ( $\beta$ ) of each explanatory variable (i.e.  
699 topological distance to the outlet, longitude and latitude) and its significance is also  
700 reported. N.I. indicates that the explanatory variable has not been included in the model;  
701 \* p-value <0.05; \*\* p-value <0.01; \*\*\* p-value <0.001.

702

703 **Figure 2**

704 Percentage of irreplaceable sites identified by Marxan for conservation targets of 50, 75,  
705 90 and 100% of the total number of alleles present in the river basin for each common  
706 species and for a pooled analysis in which all alleles from all common species were  
707 pooled together.  $N_{SITES}$  represents the number of sites included in the Marxan analyses.

708

709 **Figure 3**

710 Irreplaceable sites that have been identified for each species by Marxan for preserving  
711 90% of the total number of alleles present in the river basin (red-filled circles).

712

713 **Figure 4**

714 Irreplaceable sites that have been identified by Marxan for at least one (unicoloured-  
715 filled points), two (black dotted circles surrounding bicoloured points) or three (black  
716 bolded circle surrounding a tricoloured point) species, assuming a conservation target of  
717 90% of the total number of alleles present in the river basin when considering the six  
718 species.  
719

720 **FIGURE 1**

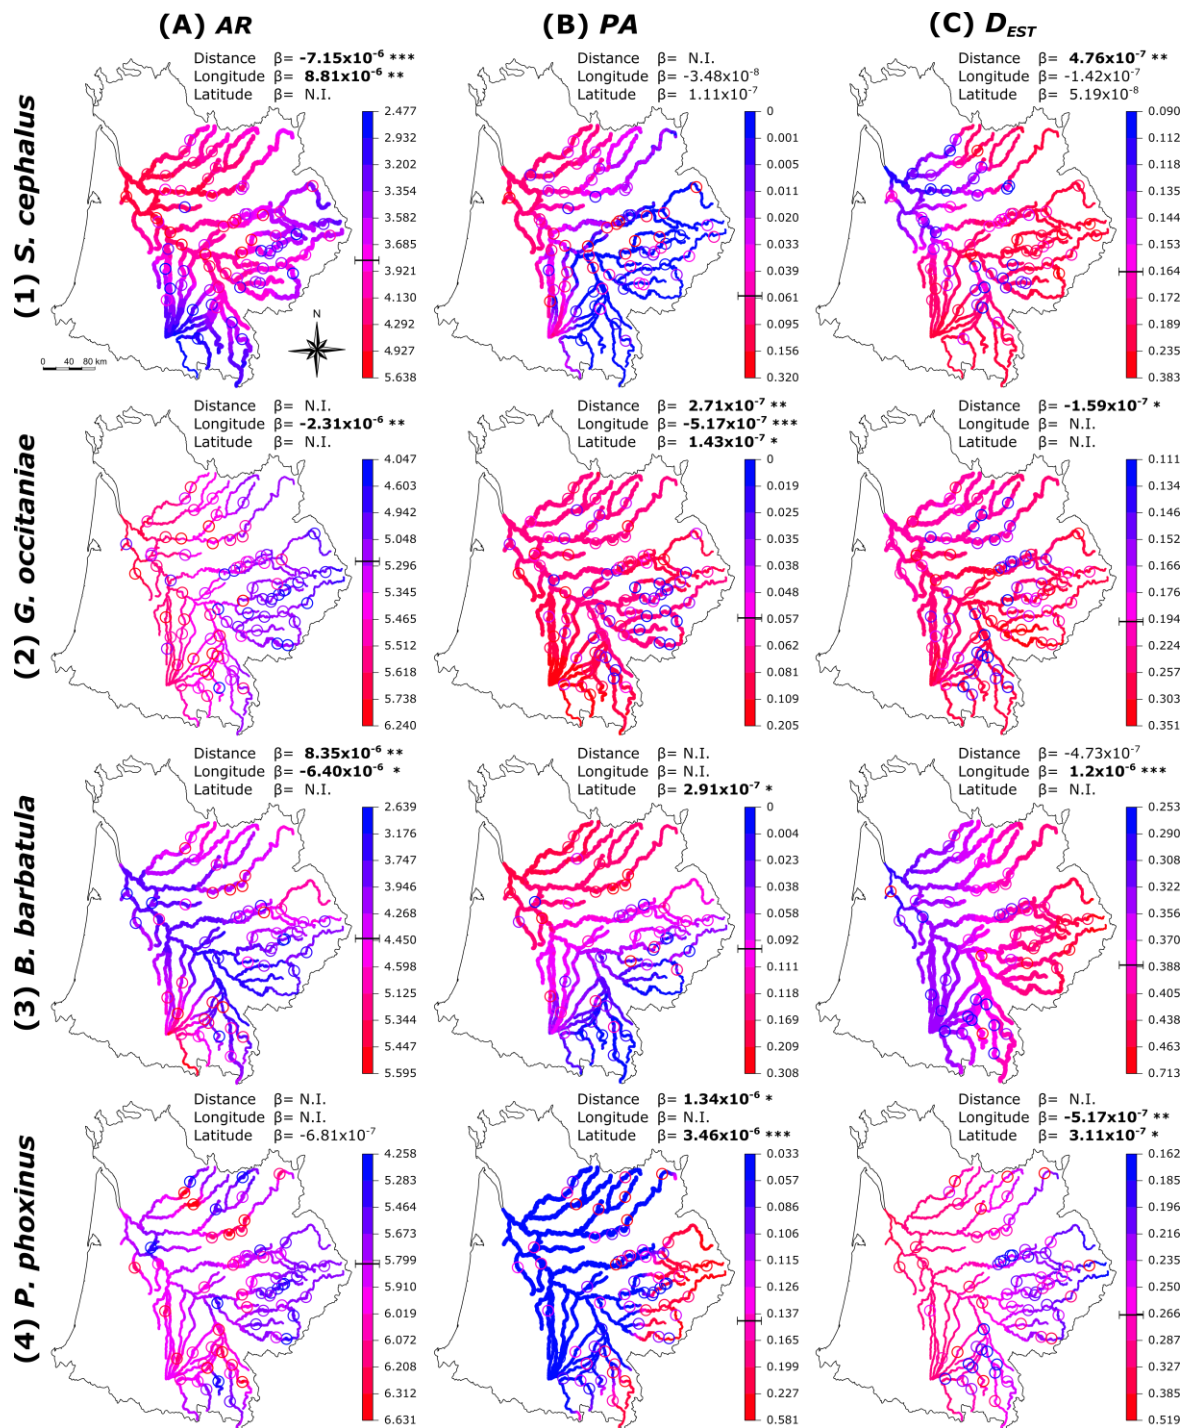

721

722

723 **FIGURE 2**

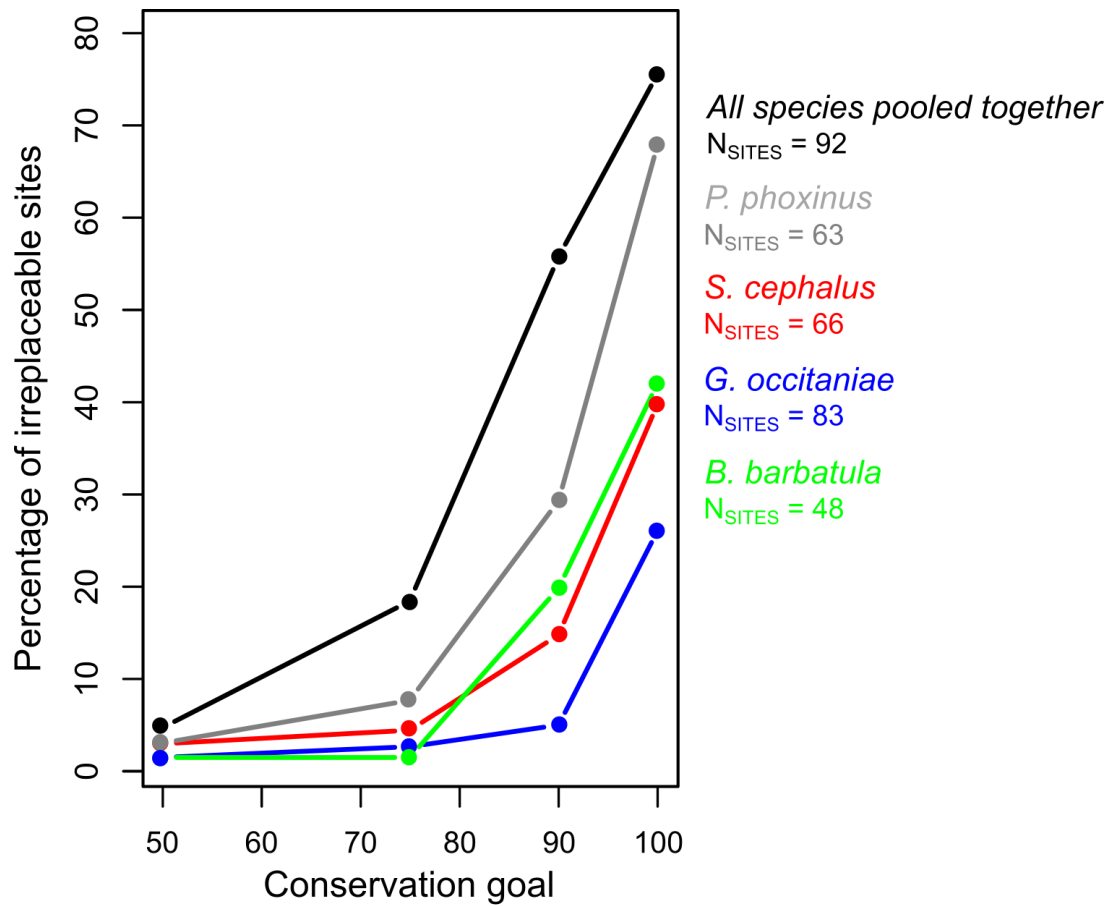

724 (Percentage of the total number of alleles to protect)

725



726 **FIGURE 3**

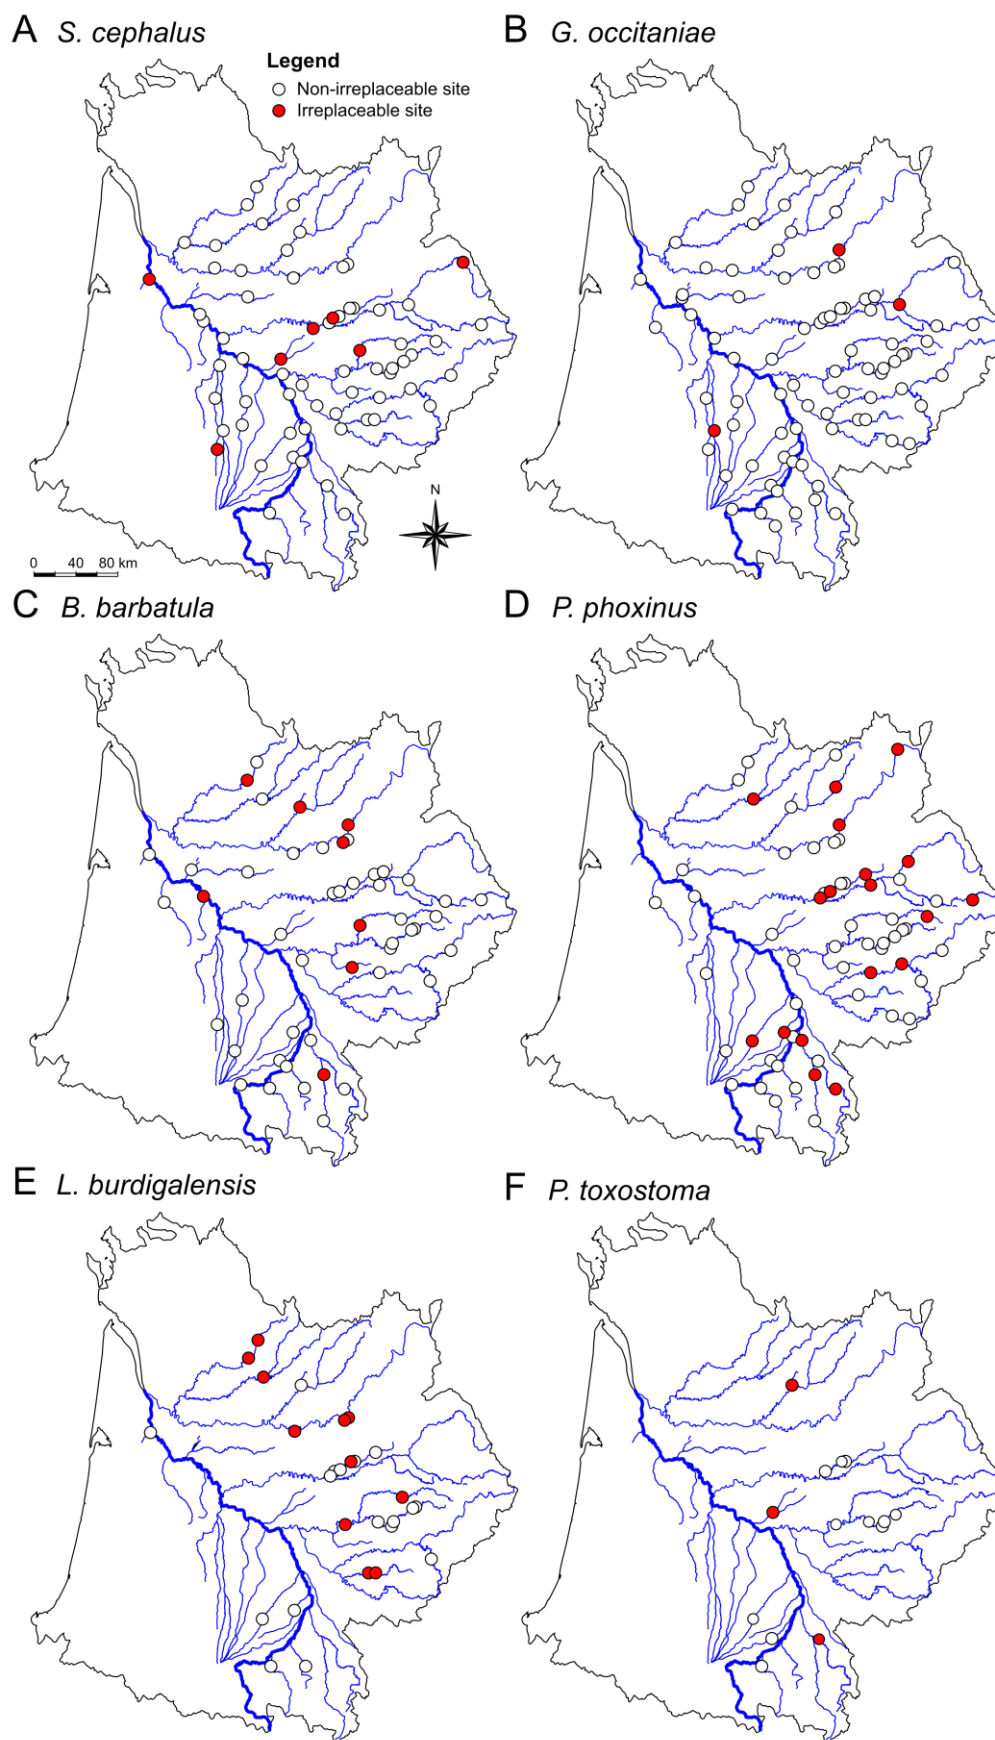

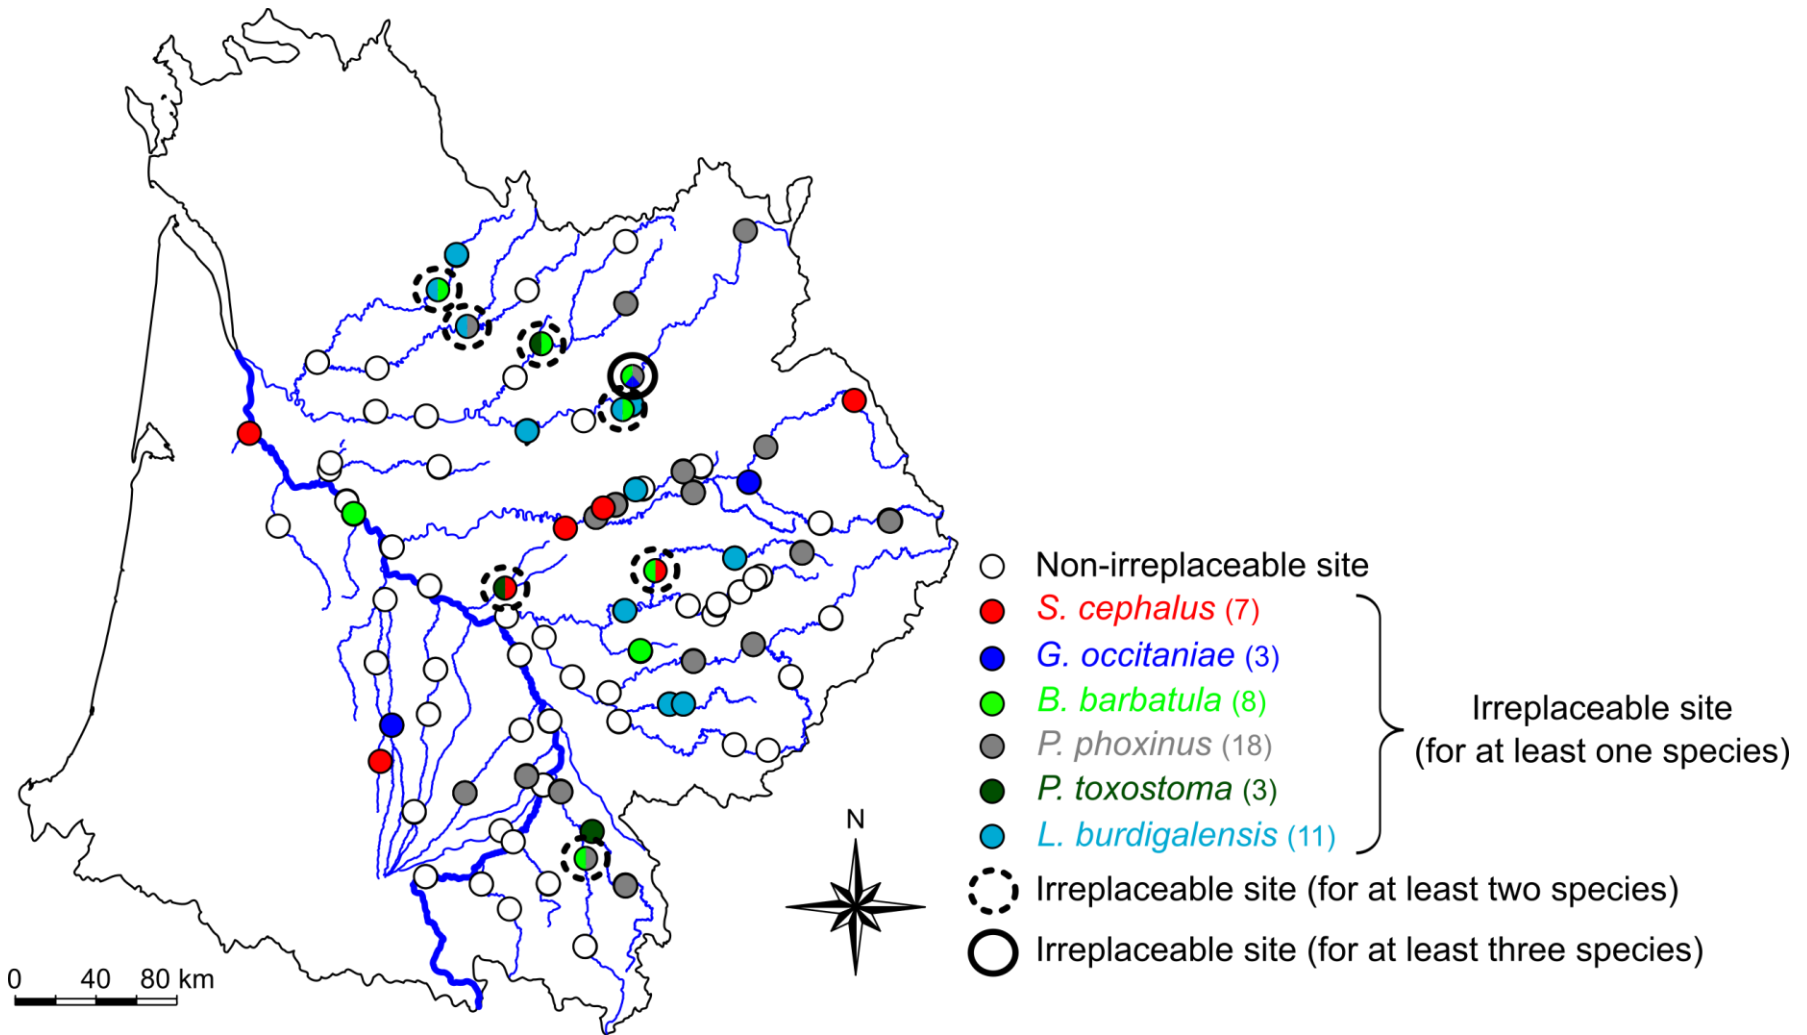

730 **TABLE 1:** Table reporting for each species the percentages of their total number of alleles that are covered by the sampling sites having  
 731 been identified as irreplaceable sites for the other species (considering the 90% conservation target).

732

| Proportion of alleles from (below) that fell within irreplaceable sites from (right): | <i>Squalius cephalus</i> | <i>Gobio occitaniae</i> | <i>Barbatula barbatula</i> | <i>Phoxinus phoxinus</i> | <i>Leuciscus burdigalensis</i> | <i>Parachondrostoma toxostoma</i> | Common species | Rare species |
|---------------------------------------------------------------------------------------|--------------------------|-------------------------|----------------------------|--------------------------|--------------------------------|-----------------------------------|----------------|--------------|
| <i>Squalius cephalus</i>                                                              | 90.00                    | 17.66                   | 61.52                      | 56.52                    | 61.60                          | 39.73                             | —              | 65.18        |
| <i>Gobio occitaniae</i>                                                               | 65.60                    | 90.00                   | 66.76                      | 79.58                    | 70.27                          | 50.97                             | —              | 73.40        |
| <i>Barbatula barbatula</i>                                                            | 49.79                    | 31.65                   | 90.00                      | 79.57                    | 76.78                          | 38.95                             | —              | 79.40        |
| <i>Phoxinus phoxinus</i>                                                              | 48.25                    | 42.60                   | 68.43                      | 90.00                    | 63.49                          | 44.61                             | —              | 68.88        |
| <i>Leuciscus burdigalensis</i>                                                        | 44.73                    | 0                       | 66.13                      | 67.09                    | 90.00                          | 36.42                             | 79.87          | —            |
| <i>Parachondrostoma toxostoma</i>                                                     | 78.55                    | 0                       | 78.55                      | 50.00                    | 67.14                          | 90.00                             | 90.00          | —            |
| <i>Average over all other species</i>                                                 | 55.58                    | 18.38                   | 68.28                      | 66.55                    | 67.86                          | 42.14                             |                |              |

733
